# Supplementary material for: Chronic cough, not asthma, is associated with depression in the elderly: a community-based population analysis in South Korea
Source: PubMed Central journal article supplement — Korean J Intern Med. 2019 Oct 16;34(6):1363–71. doi: 10.3904/kjim.2018.187 (PMC6823556; doi:10.3904/kjim.2018.187), 2019-10-16
Supplement: kjim-2018-187-suppl.pdf [file kjim-2018-187-suppl.pdf]

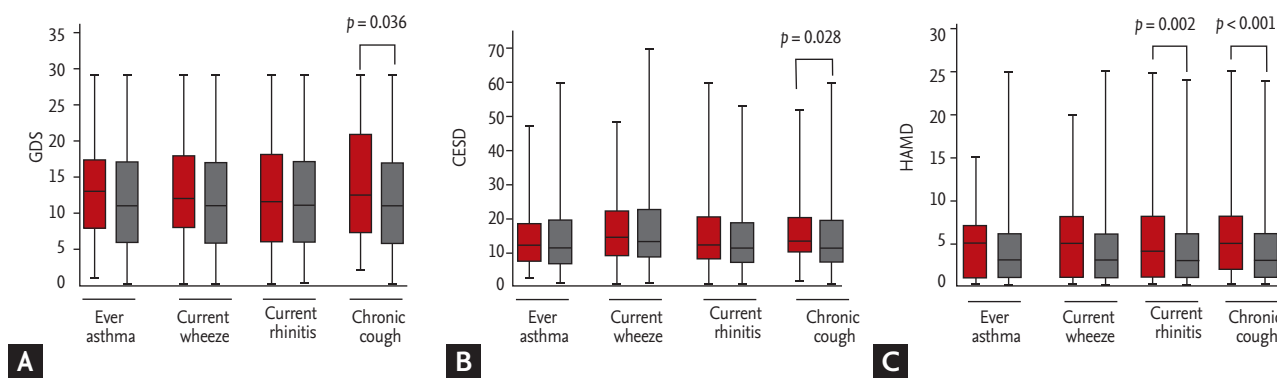

**Supplementary Figure 1.** Influence of allergic disease on scales of depression. (A) Geriatric Depression Scale (GDS), (B) Center for Epidemiologic Studies Depression Scale (CES-D), (C) Hamilton Rating Scale for Depression (HAM-D). To analyze the effects of allergy on scales of depression, analysis of variance was performed followed by univariate tests. The boxplots indicate interquartile range (IQR), the upper whisker is  $1.5 \text{ IQR} + Q_3$ , the lower whisker is  $1.5 \text{ IQR} - Q_1$ , and the line in the middle shows the median.
